# Supplementary material for: An efficient and simple method for site-selective modification of O6-methyl-2′-deoxyguanosine in DNA
Source: Royal Society of Chemistry journal article supplement (doi:10.1039/c2cc17621a), 2012-01-01
Supplement: c2cc17621a.pdf [file c2cc17621a.pdf]

## Supporting Information

### An efficient and simple method for site-selective modification of *O*<sup>6</sup>-methyl-2'-deoxyguanosine in DNA

Kazumitsu Onizuka,<sup>a,b</sup> Takamasa Nishioka,<sup>a</sup> Zhichun Li,<sup>a,b</sup> Daichi Jitsuzaki,<sup>a</sup> Yosuke,  
Taniguchi,<sup>a, b</sup> and Shigeki Sasaki<sup>a,b\*</sup>

*Graduate School of Pharmaceutical Sciences, Kyushu University, 3-1-1 Maidashi, Higashi-ku, Fukuoka 812-8582, Japan, Fax &Tel: +81-92-642-6615; E-mail: saski@phar.kyushu-u.ac.jp.*  
<sup>b</sup> *CREST, Japan Science and Technology Agency, 4-1-8 Motomachi, Kawaguchi, Saitama 332-0012, Japan.*

|                                                                                  |   |
|----------------------------------------------------------------------------------|---|
| <b>Scheme 1. The structure of the probe ODN</b>                                  | 2 |
| <b>The synthesis of the ODN probes</b>                                           | 2 |
| <b>Fig. S1. HPLC change for the synthesis of the ODN probe (ODN2).</b>           | 2 |
| <b>The functionality transfer reaction</b>                                       | 3 |
| <b>Fig. S2. The DNA substrates used in this study</b>                            | 3 |
| <b>Fig. S3. HPLC change for the functionality transfer reaction</b>              | 4 |
| <b>Table S1. MALDI-TOF/MS data of the oligodeoxynucleotides</b>                  | 5 |
| <b>Click reaction with FAM-N<sub>3</sub> in the presence of CuSO<sub>4</sub></b> | 5 |
| <b>FAM labeling and detection of <i>O</i><sup>6</sup>-Me-dG in 80 mer DNA</b>    | 6 |
| <b>The biotin labeling and chemiluminescent detection</b>                        | 6 |
| <b>Fig. S4. Detection of biotin-labelled DNA1 by chemiluminescence</b>           | 7 |

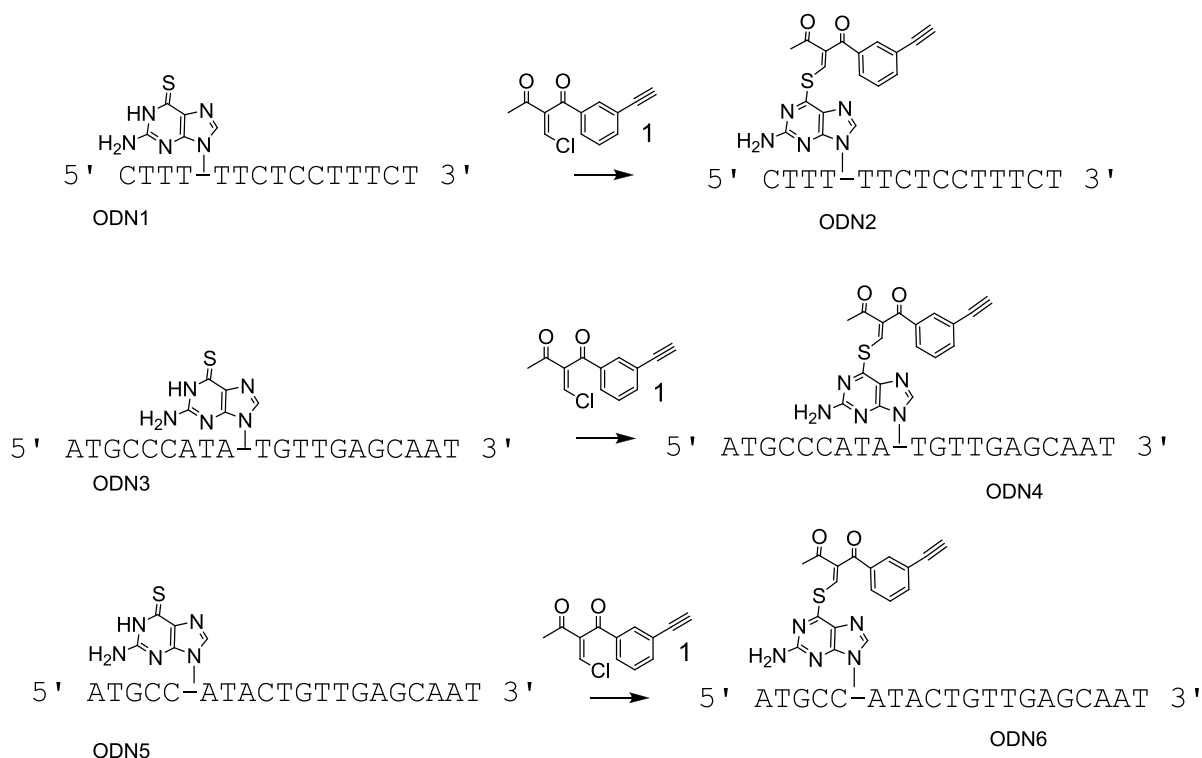

**Scheme S1.** The structure of the probe ODN.

### Synthesis of the functionality-transfer ODN(2, 4 and 5) (FT-ODN)

The synthesis of ODN2 as a general procedure

A solution of 2  $\mu$ L ODN1 (750  $\mu$ M final concentration, 1.5 nmol) was dissolved in 2.7  $\mu$ L carbonate buffer (50 mM, pH 10) in a polypropylene microtube. A solution of 0.3  $\mu$ L **1** (25 mM in  $\text{CH}_3\text{CN}$ , 7.5 nmol) was added to the above solution, and the mixture was kept at room temperature for 10 min. The reaction mixture was checked by HPLC using the following conditions: column: 4.6  $\times$  250 mm (SHISEIDO C18), buffer A: 0.1 M TEAA, buffer, B:  $\text{CH}_3\text{CN}$ , gradient: 10% to 30% /buffer B in 20 min, linear gradient, flow rate: 1.0 ml/min, detection: UV at 254 nm.

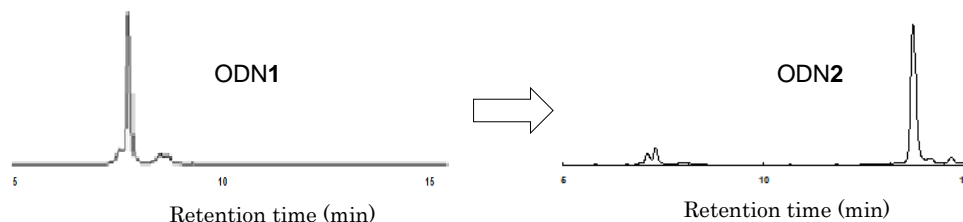

**Fig. S1.** HPLC change for the synthesis of the ODN probe (ODN2).

## The functionality transfer reaction

The reaction with ODN2 and DNA4 as a general procedure

A solution of 1  $\mu\text{L}$  ODN2 (200  $\mu\text{M}$ , 200 pmol) was added to 1.0  $\mu\text{L}$  DNA4 (50  $\mu\text{M}$ , 50 pmol) in MES buffer (1 M NaCl-0.5 M MES, 5  $\mu\text{L}$ , pH 7.0), and diluted with pure water to adjust the volume to 50  $\mu\text{L}$  (ODN2 at 4  $\mu\text{M}$  final concentration, DNA4 at 1  $\mu\text{M}$  final concentration, 100 mM NaCl, 50 mM MES buffer final concentration, pH 7.0). The mixture was kept at 25°C, and the reaction mixture was analyzed by HPLC using the following conditions: column: 4.6  $\times$  250 mm (SHISEIDO C18), buffer A: 0.1 M TEAA buffer, buffer B:  $\text{CH}_3\text{CN}$ , gradient: 10% to 30% buffer B in 20 min, linear gradient, flow rate: 1.0 mL/min, detection: UV at 254 nm. The HPLC profiles are summarized in Fig. 1(A), and the time course is shown in Fig. 1(B).

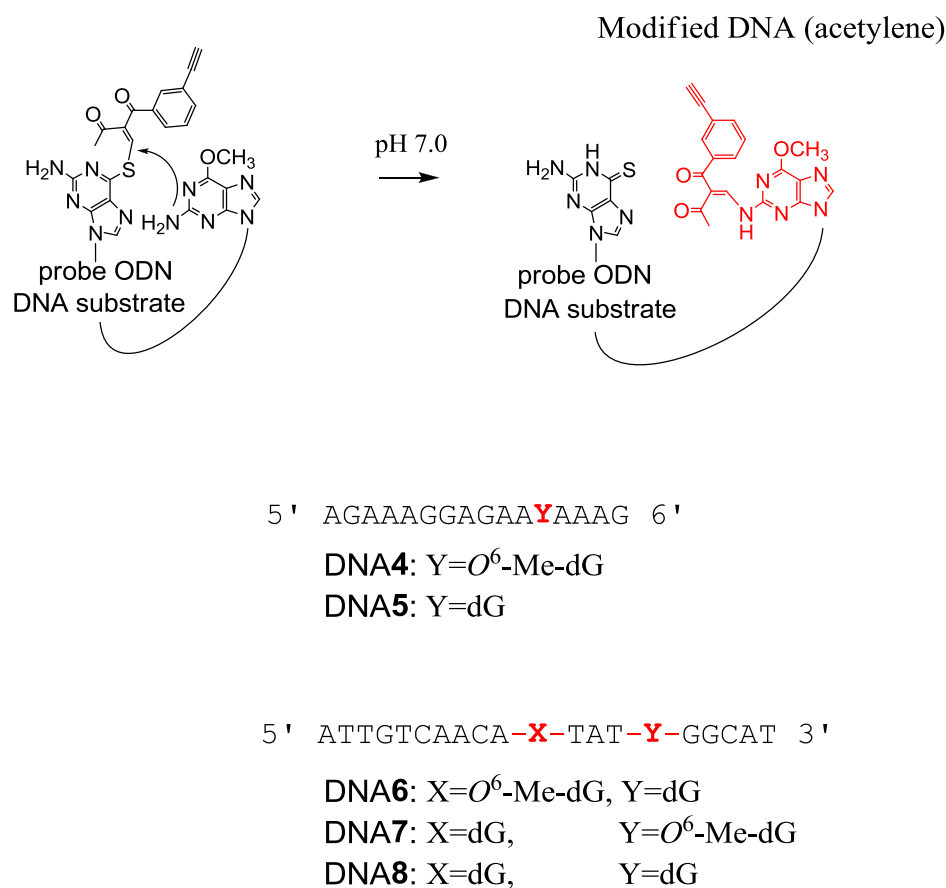

**Fig. S2.** The DNA substrates used in this study.

(A) ODN4 reaction with DNA6

ODN4 decreased and the modified DNA6 increased.

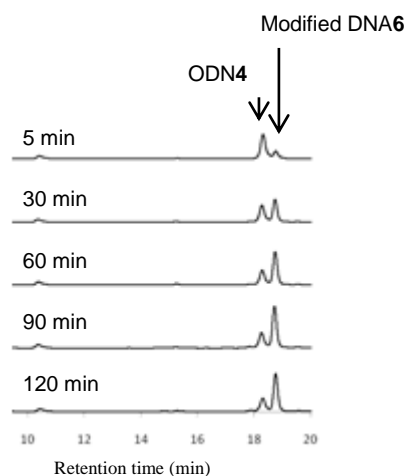

(C) ODN6 reaction with DNA7

ODN6 decreased and the modified DNA7 increased.

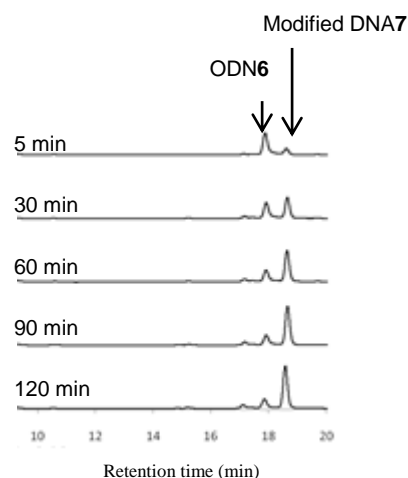

(B) ODN4 reaction with DNA8

ODN4 did not change, nor the modified DNA8 formed.

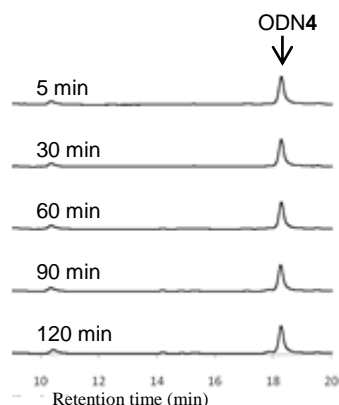

(D) ODN6 reaction with DNA8

ODN6 did not change, nor the modified DNA8 formed.

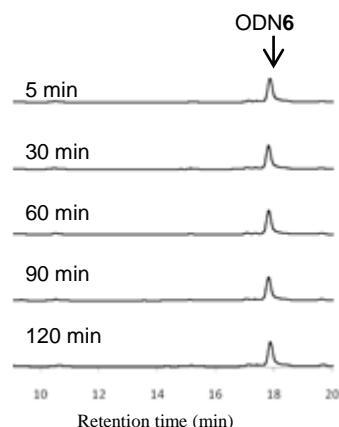

**Fig. S3.** HPLC change for the functionality transfer reaction. (A) ODN4 forming the modified DNA6, (B) ODN4 nonreactive to DNA8, (C) ODN6 forming the modified DNA, (D) ODN6 nonreactive to DNA8. The reaction conditions are described in the general procedure. Column: SHISEIDO CAP CELL PAK C<sub>18</sub>, buffer A: 0.1 M TEAA, buffer B: CH<sub>3</sub>CN, gradient: 10% to 20% buffer B in 20 min linear gradient, flow rate: 1.0 ml/min, column oven at 50°C, detection: UV at 254 nm.

**Table S1.** MALDI-TOF/MS data of the oligonucleotides.

| DNA or RNA                | calcd. ([M-H] <sup>-</sup> ) | found  |
|---------------------------|------------------------------|--------|
| ODN1                      | 4767.8                       | 4767.1 |
| ODN2                      | 4962.8                       | 4963.0 |
| ODN3                      | 6457.0                       | 6457.4 |
| ODN4                      | 6653.1                       | 6653.2 |
| ODN5                      | 6457.0                       | 6457.3 |
| ODN6                      | 6653.1                       | 6653.3 |
| DNA4                      | 5056.0                       | 5056.4 |
| Modified DNA4(acetylene)  | 5252.6                       | 5253.0 |
| FAM-DNA4                  | 5711.1                       | 5710.1 |
| DNA5                      | 5041.9                       | 5041.7 |
| Modified DNA5(acetylene)  | 5238.0                       | 5237.4 |
| Biotin- DNA5              | 5709.2                       | 5709.6 |
| DNA6                      | 6455.1                       | 6455.8 |
| Modified DNA6 (acetylene) | 6651.1                       | 6651.7 |
| FAM-DNA6                  | 7109.2                       | 7109.8 |
| DNA7                      | 6455.1                       | 6455.3 |
| Modified DNA7(acetylene)  | 6651.1                       | 6651.9 |
| FAM-DNA7                  | 7109.2                       | 7109.1 |

#### Click reaction with FAM-N<sub>3</sub> in the presence of CuSO<sub>4</sub>

The reaction of the modified DNA4 as a general procedure

A solution of CuSO<sub>4</sub> (0.34  $\mu$ L, 25 mM in H<sub>2</sub>O, 0.15 mM at final concentration) was added into the mixture containing the following solution: a solution of modified DNA4 (28  $\mu$ L, 425 pmol after the transfer reaction, 10  $\mu$ M final concentration), a solution of sodium ascorbate (0.34  $\mu$ L, 50 mM in H<sub>2</sub>O, 0.3 mM final concentration), and TBTA (tris[(1-benzyl-1H-1,2,3-triazol-4-yl)methyl]amine) (0.34  $\mu$ L, 50 mM in DMSO, 0.6 mM final concentration) and FAM-N<sub>3</sub> (Fig. 5(B), 4.25  $\mu$ L, 10 mM in DMSO, 0.75 mM final concentration) and 7.7  $\mu$ L DMSO (DMSO-H<sub>2</sub>O, 30% final volume) in a polypropylene microtube. The reaction was monitored by HPLC using the following conditions: column: 4.6  $\times$  250 mm (SHISEIDO C18), buffer A: 0.1 M TEAA, buffer B: CH<sub>3</sub>CN, gradient: 10% to 30% buffer B in 20 min, 30% to 100% buffer B in 25 min, flow rate: 1.0 mL/min, detection: UV at 254 nm. The HPLC change is shown in Fig. 5(A).

### The protocol for fluorescent detection of *O*<sup>6</sup>-Me-dG in 80 mer DNA

Step 1: The mixture of ODN2 (2.8  $\mu$ L of 150  $\mu$ M solution, 15  $\mu$ M at final concentration), 80 mer DNA sample (DNA1, 0.5, 1.0, 2.5, 5.0 or 7.5  $\mu$ L of 1.0 pmol/ $\mu$ L solution, or 0.2, 0.5, 1.0, 1.5 or 2.0  $\mu$ L of 50 pmol/ $\mu$ L solution), the MES buffer (2.8  $\mu$ L of 0.5 M solution, 50 mM at final concentration, pH 7.0) and NaCl solution (2.8  $\mu$ L of 1M solution, 100 mM at final concentration) was diluted with MilliQ water to 28  $\mu$ L final volume, and kept at room temperature for 1 hour.

Step 2: Into the above mixture were added FAM-azide in DMSO (4.25  $\mu$ L of 10 mM solution, 42.5 nmol), sodium ascorbate in H<sub>2</sub>O (0.34  $\mu$ L of 50 mM solution, 17 nmol), TBTA in DMSO (0.34  $\mu$ L of 50 mM solution), CuSO<sub>4</sub> in H<sub>2</sub>O (0.34  $\mu$ L of 25 mM solution, 8.5 nmol) and 7.7  $\mu$ L of DMSO, and the mixture was kept at room temperature for 30 min.

Step 3: The reaction mixture was diluted with 20  $\mu$ L of the loading buffer (90% formamide, 20 mM EDTA), and treated with 2.2  $\mu$ L of 28% aqueous ammonia for 10 min, then acidified with 45  $\mu$ L of aqueous 10 % citric acid.

Step 4: The reaction mixture was diluted with saturated aqueous NaCl solution (100  $\mu$ L), extracted with methyl isobutyl ketone (300  $\mu$ L, 12 times) to remove small molecules.

Step 5: The aqueous layer was filtered through a membrane filter (Amicon Ultra, 0.5 mL, 10K) and washed with MilliQ (0.5 mLx30 min, 5 times) by centrifugation (10,000 g). The modified DNA1 on the filter was dissolved in 5 mM MES buffer (1.5 mL), and the whole solution was subjected to the fluorescent measurement with excitation at 494 nm at 25 °C. The fluorescent spectra and the dose-dependency thus obtained are shown in Fig. 6.

### The protocol for the biotin labeling and following chemiluminescent detection of *O*<sup>6</sup>-Me-dG in DNA

The labeling protocol from step 1 to 5 was the same as above except that the biotin-azide shown below was used instead of FAM-azide.

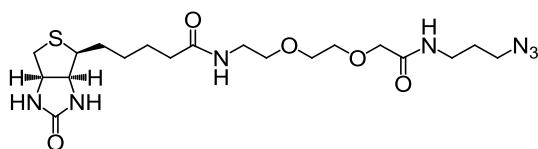

Biotin-azide

1  $\mu$ L of the solution of the labeled DNA was applied on the membrane (Hybond-N+), and heated in the oven for 2 hours at 80°C. The membrane was blocked for 1 hour with the blocking solution (5% skim milk in TBST), and treated with streptavidin-alkaline phosphatase (20  $\mu$ L in 5 mL of Blocking one) for 2 hours, then successively washed

with the blocking solution for 10 min and TBST for 10 min twice. The membrane was immersed in the CDP-Star substrate solution (0.25 mM), and chemiluminescence was measured by LAS4000. The image and the quantified data are shown in Fig. S4. TBST: Tris-HCl, 50 mM; NaCl, 150 mM; Tween 20, 0.05 %. Blocking one and streptavidin alkaline phosphatase were purchased from Nacalai and R&D Systems, respectively.

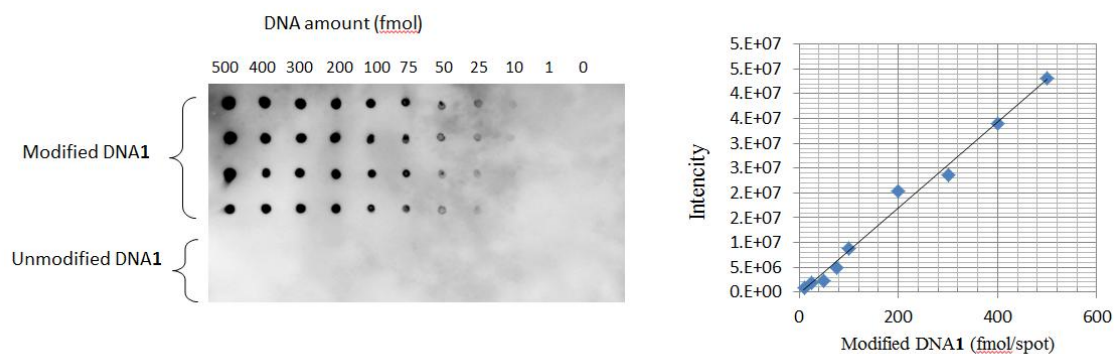

**Fig. S4. Detection of biotin-labelled DNA1 by chemiluminescence.**
